# Supplementary material
Source: PubMed Central journal article supplement (PMC9018532)

**A****FEMALES**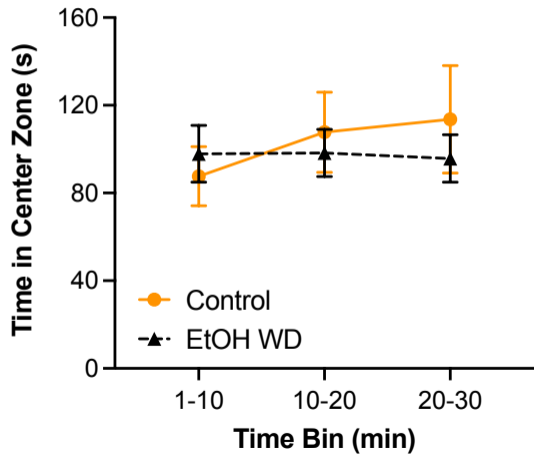**B****MALES**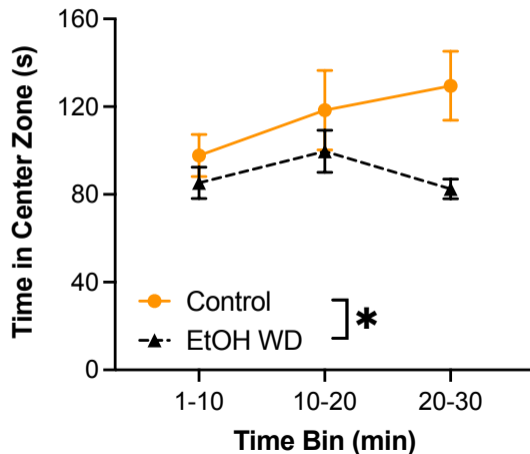

Supplement: NIHMS1775774-supplement-fS1.pdf [file NIHMS1775774-supplement-fS1.pdf]

**A****FEMALES**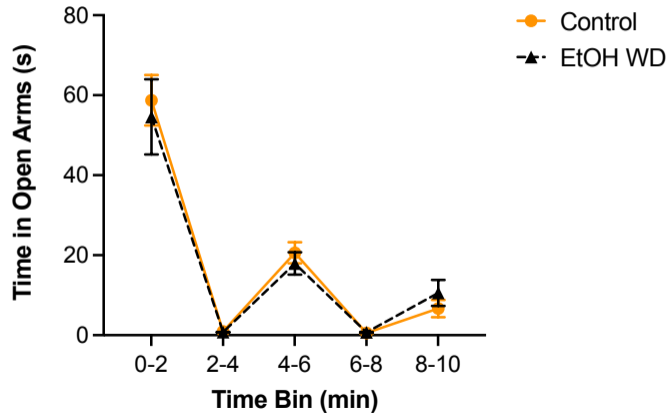**B****MALES**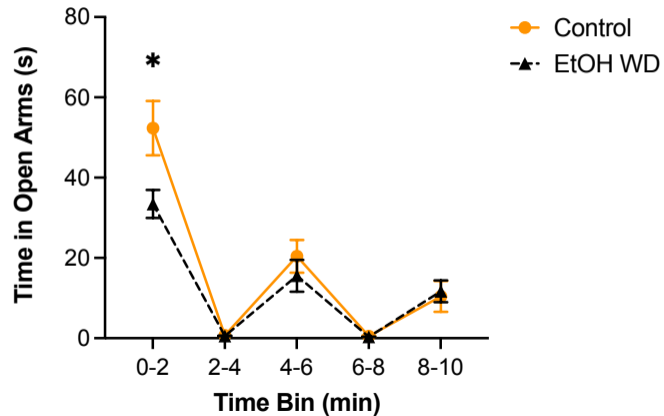

Supplement: NIHMS1775774-supplement-fS2.pdf [file NIHMS1775774-supplement-fS2.pdf]

Females ns Males

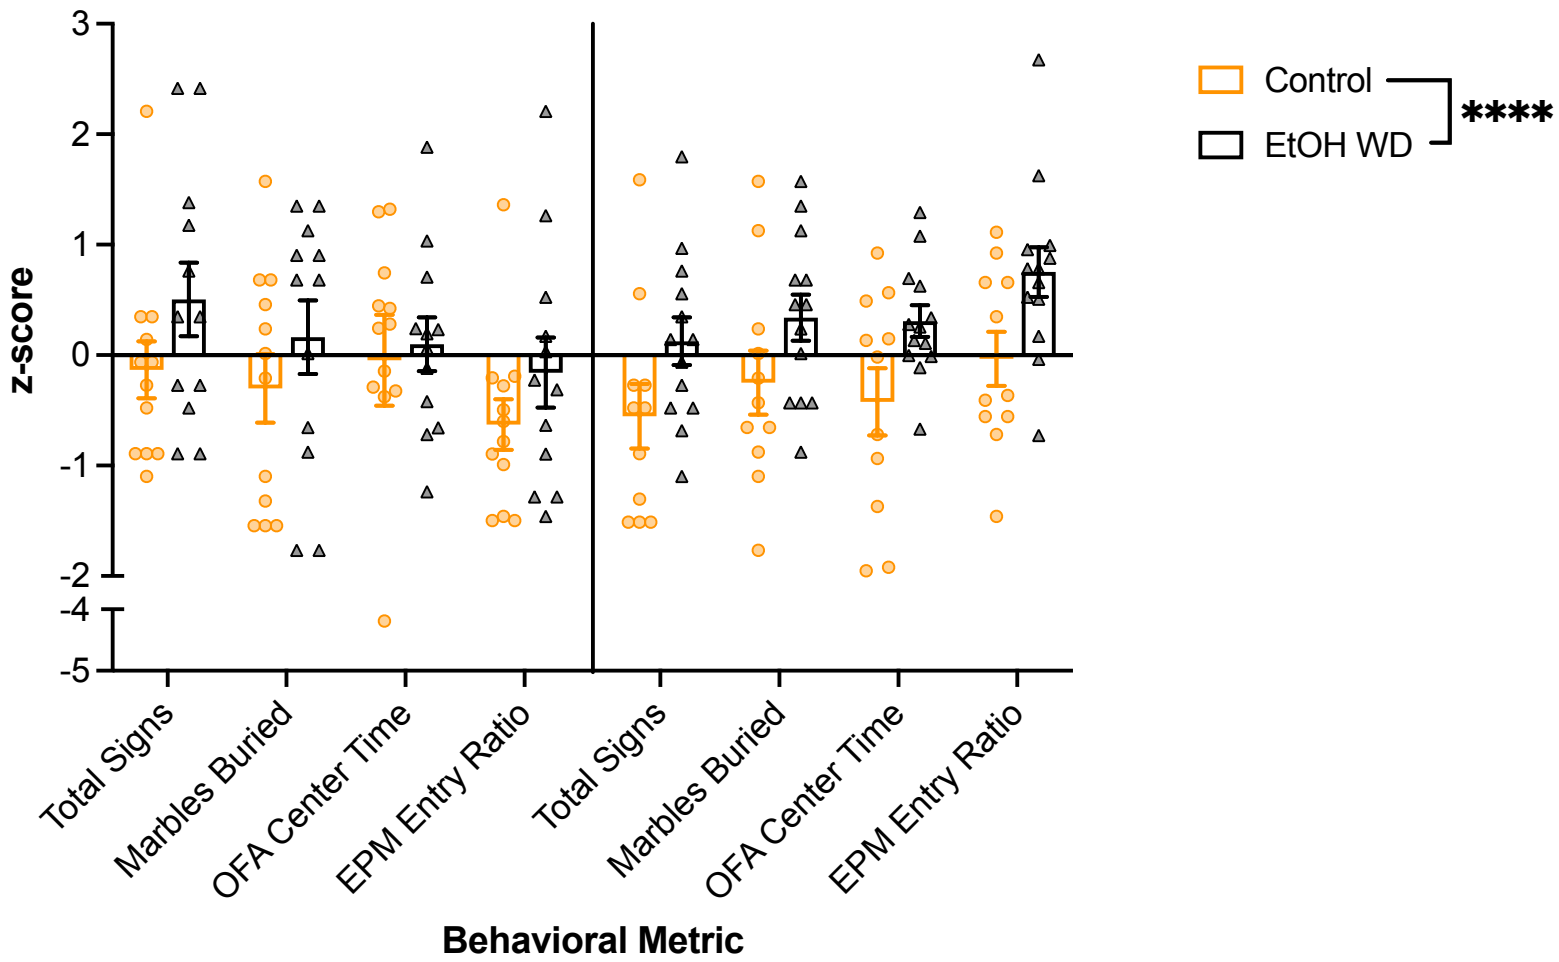

Supplement: NIHMS1775774-supplement-fS3.pdf [file NIHMS1775774-supplement-fS3.pdf]

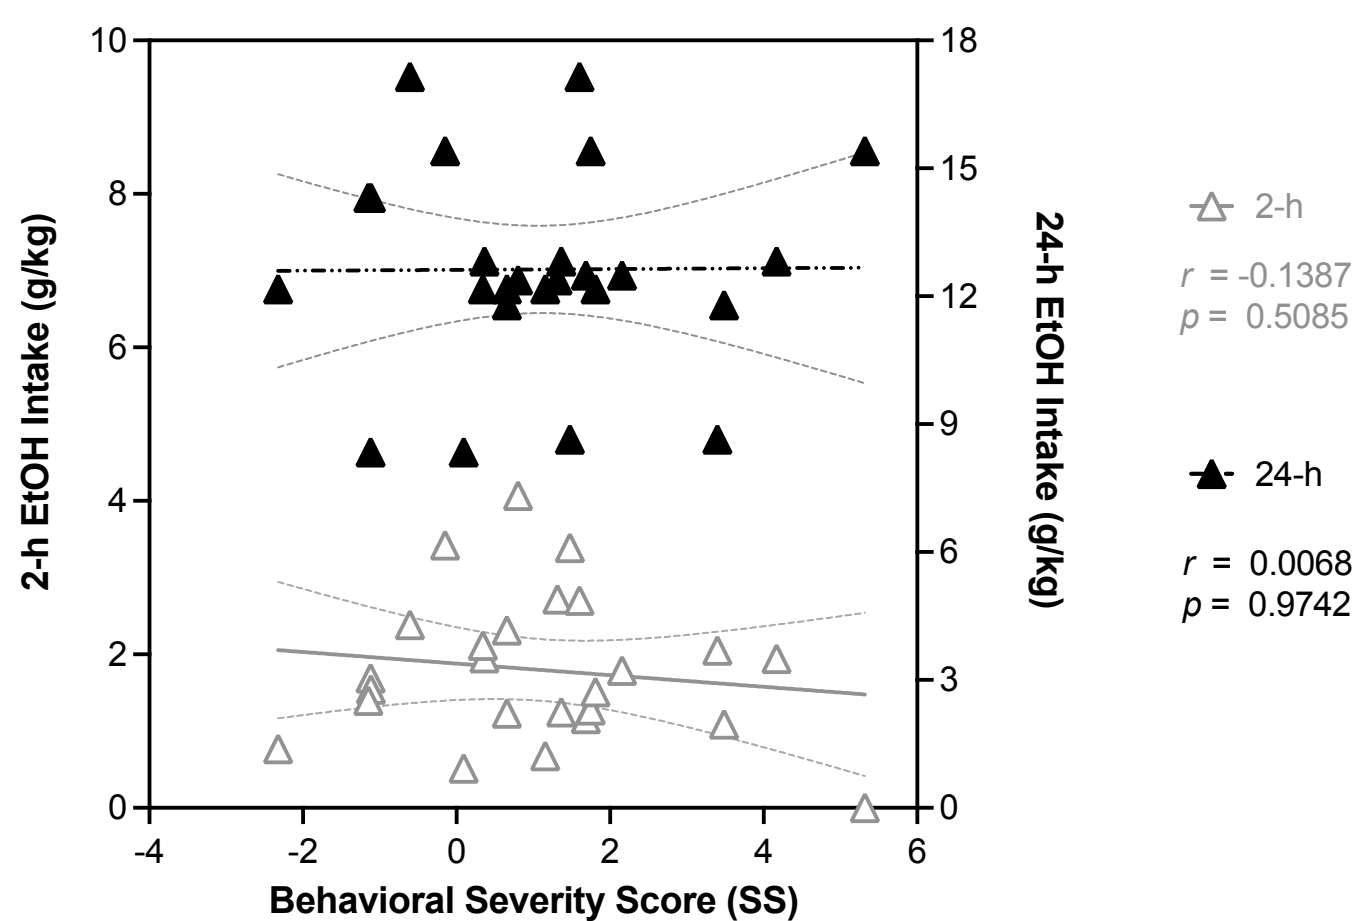

Supplement: NIHMS1775774-supplement-fS4.pdf [file NIHMS1775774-supplement-fS4.pdf]
